# Supplementary material for: Cation structure-dependence of the induced free charge density gradient in imidazolium and pyrrolidinium ionic liquids
Source: Royal Society of Chemistry journal article supplement (doi:10.1039/d2cp01066f), 2022-01-01
Supplement: d2cp01066f1.pdf [file d2cp01066f1.pdf]

## Supporting Information

### Characterizing the Structure-Dependence of the Induced Free Charge Density Gradient in Imidazolium and Pyrrolidinium Ionic Liquids

Yufeng Wang,<sup>1</sup> Laxmi Adhikari,<sup>2</sup> Gary A. Baker<sup>2</sup> and G. J. Blanchard<sup>1,\*</sup>

<sup>1</sup> Michigan State University, Department of Chemistry, East Lansing, MI 48824 USA

<sup>2</sup> University of Missouri, Department of Chemistry, Columbia, MO 65211 USA

---

\* Author to whom correspondence should be addressed: email: [blanchard@chemistry.msu.edu](mailto:blanchard@chemistry.msu.edu), tel: +1 517 353 1105.

NMR spectra of RTILs used in this work.

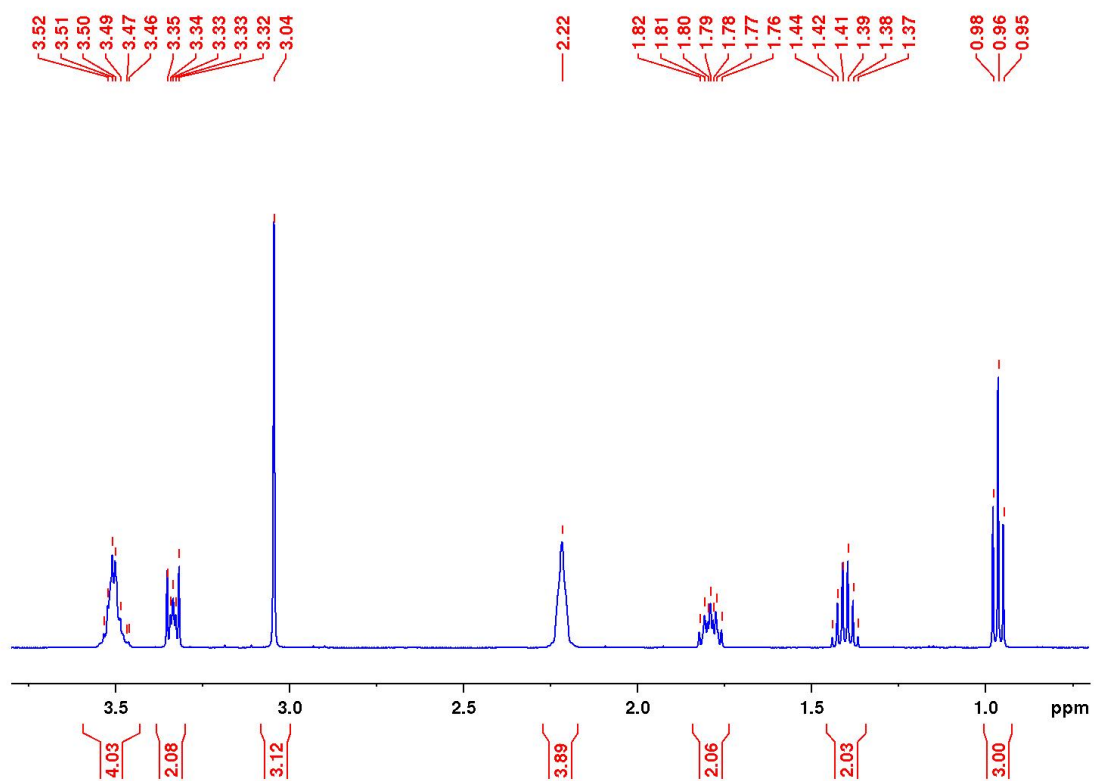

**Fig S1.** <sup>1</sup>H NMR spectrum (500 MHz, D<sub>2</sub>O) of **BMPyrr<sup>+</sup>Br<sup>-</sup>**: δ 3.57–3.44 (m, 4H), 3.36–3.30 (m, 2H), 3.04 (s, 3H), 2.22 (tt,  $J = 5.5, 1.9$  Hz, 4H), 1.84–1.74 (m, 2H), 1.40 (h,  $J = 7.4$  Hz, 2H), 1.01–0.93 (m, 3H).

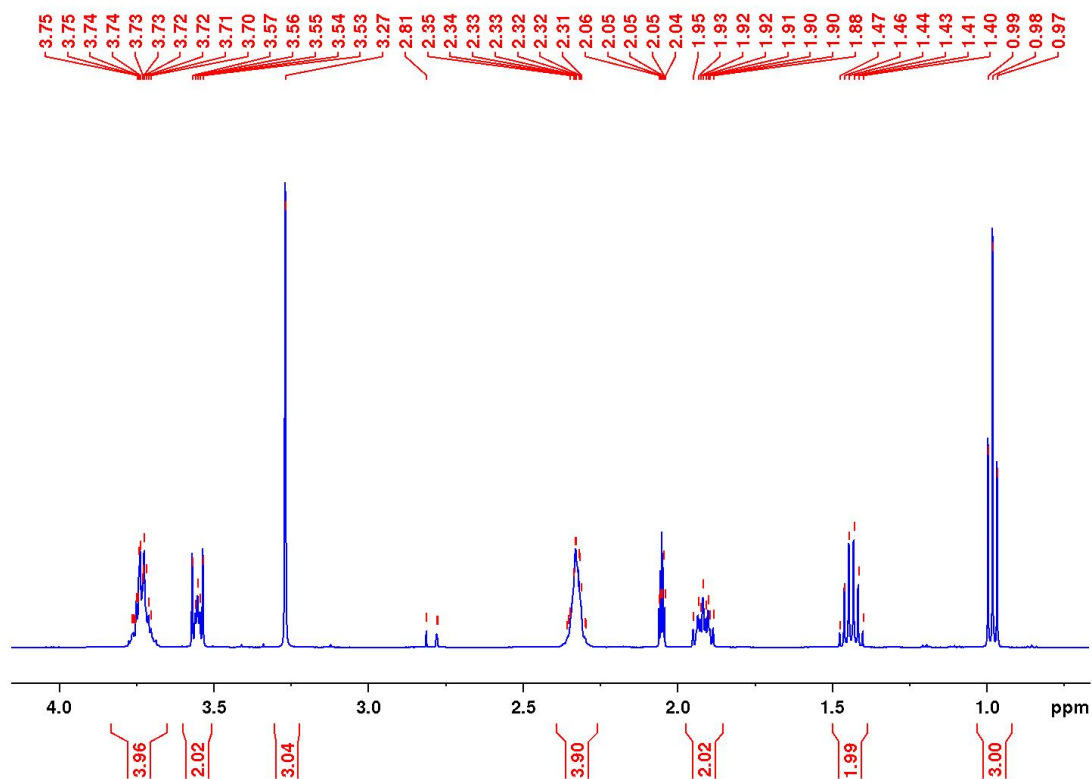

**Fig S2.**  $^1\text{H}$  NMR spectrum (500 MHz, acetone- $\text{d}_6$ ) of **BMPyrr $^+$ TFSI $^-$** :  $\delta$  3.80–3.67 (m, 4H), 3.64–3.51 (m, 2H), 3.27 (s, 3H), 2.33 (dddq,  $J = 7.2, 6.1, 3.2, 1.5$  Hz, 4H), 1.96–1.85 (m, 2H), 1.44 (h,  $J = 7.4$  Hz, 2H), 0.98 (t,  $J = 7.4$  Hz, 3H). The residual  $(\text{CH}_3)_2\text{CO}$  peak from acetone- $\text{d}_6$  can be seen at 2.05 ppm. Peaks arising from  $\text{H}_2\text{O}$  and HDO (near 2.84 and 2.81 ppm, respectively) are evident. Control experiments validated that these arose from moisture present in the acetone- $\text{d}_6$  solvent itself.

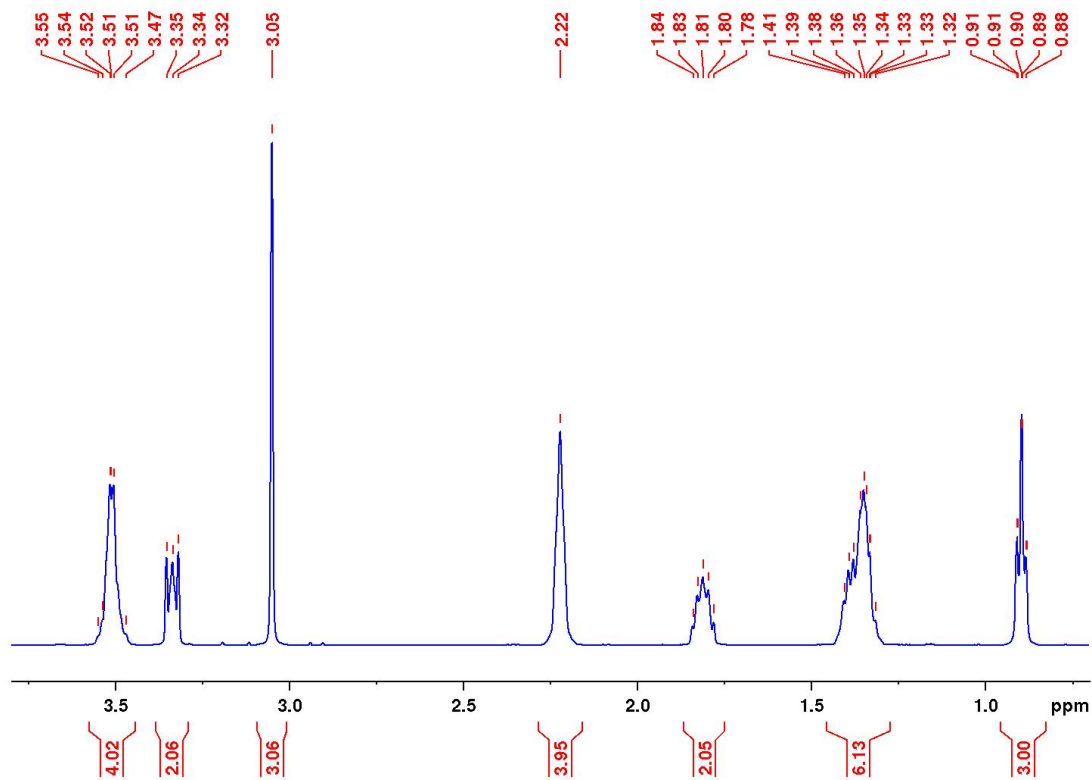

**Fig S3.** <sup>1</sup>H NMR spectrum (500 MHz, D<sub>2</sub>O) of **HMPyrr<sup>+</sup>Br<sup>-</sup>**: δ 3.57–3.45 (m, 4H), 3.38–3.28 (m, 2H), 3.10–3.01 (m, 3H), 2.27–2.18 (m, 4H), 1.81 (ddt,  $J = 12.6, 8.7, 4.6$  Hz, 2H), 1.43–1.28 (m, 6H), 0.94–0.84 (m, 3H).

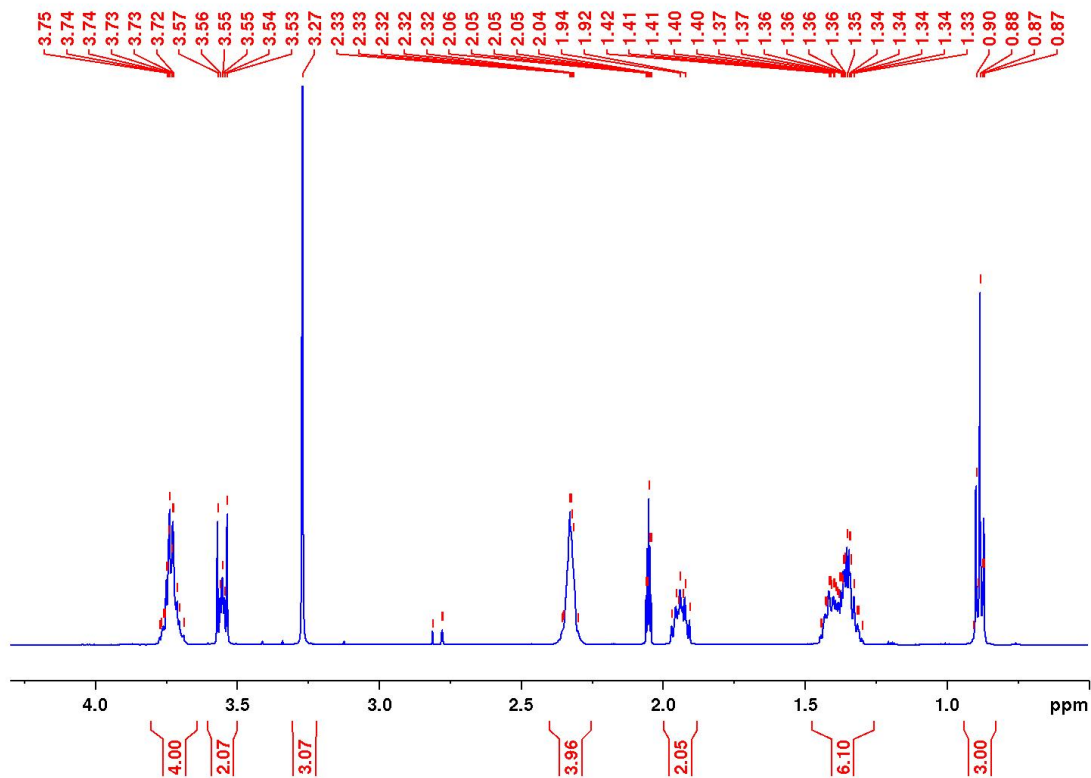

**Fig S4.** <sup>1</sup>H NMR spectrum (500 MHz, acetone-d<sub>6</sub>) of **HMPyrr<sup>+</sup>TFSI<sup>-</sup>**: δ 3.81–3.67 (m, 1H), 3.61–3.50 (m, 1H), 3.27 (s, 1H), 2.33 (tdd,  $J = 5.8, 2.9, 1.5$  Hz, 1H), 1.94 (dq,  $J = 12.2, 8.2, 7.7$  Hz, 1H), 1.49–1.27 (m, 1H), 0.88 (t,  $J = 7.1$  Hz, 1H).

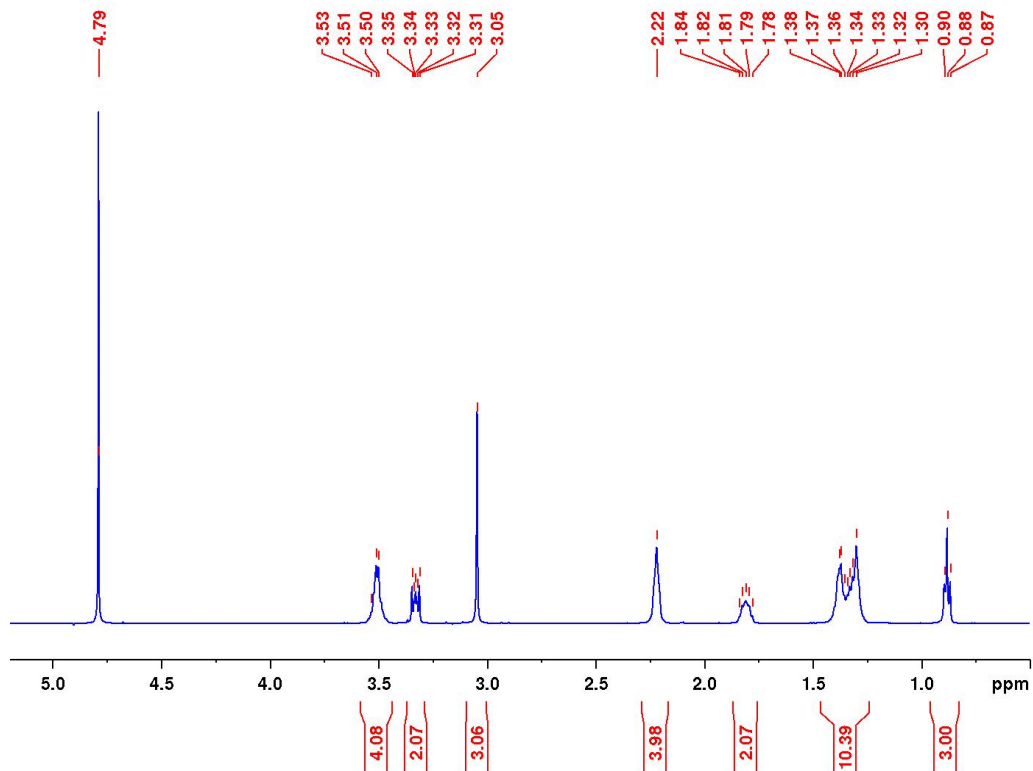

**Fig S5.**  $^1\text{H}$  NMR spectrum (500 MHz,  $\text{D}_2\text{O}$ ) of  $\text{OMPyr}^+\text{Br}^-$ :  $\delta$  3.51 (h,  $J = 5.7, 4.7$  Hz, 4H), 3.35–3.31 (m, 2H), 3.05 (s, 3H), 2.22 (q,  $J = 4.5, 3.7$  Hz, 4H), 1.84–1.78 (m, 2H), 1.38–1.30 (m, 10H), 0.88 (t,  $J = 6.6$  Hz, 3H). A residual water peak from  $\text{D}_2\text{O}$  is seen at 4.79 ppm.

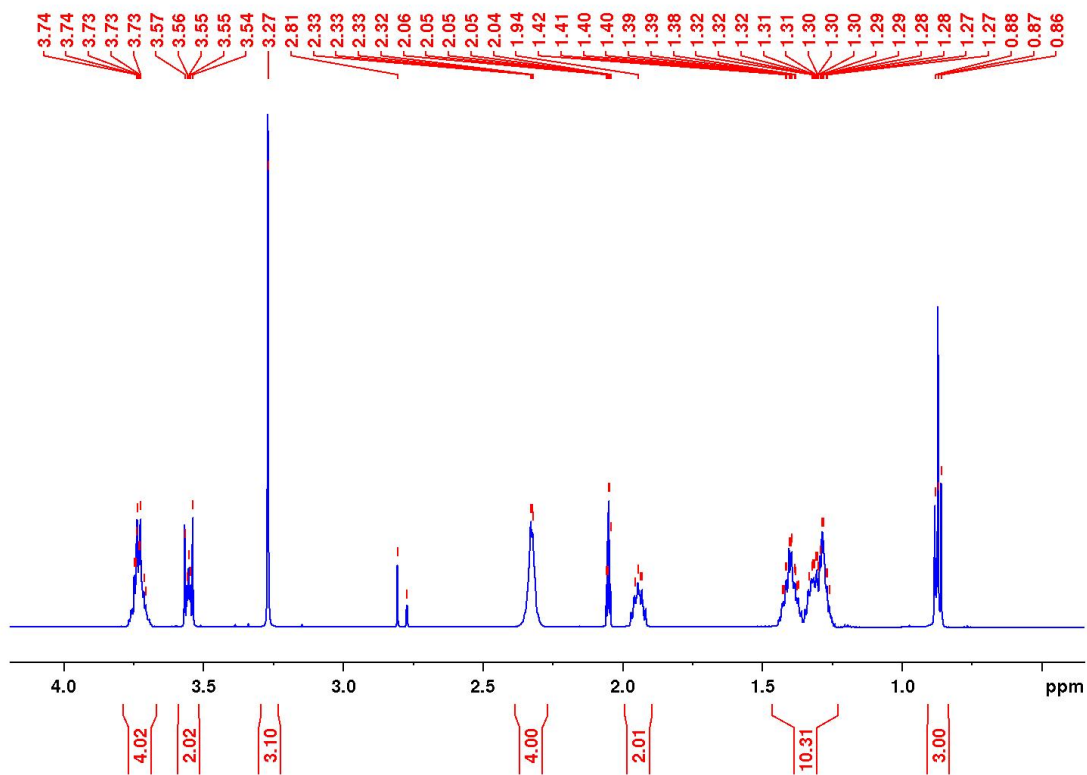

**Fig S6.**  $^1\text{H}$  NMR spectrum (600 MHz, acetone- $\text{d}_6$ ) of **OMPyr $^+$ TFSI $^-$** :  $\delta$  3.74–3.73 (m, 4H), 3.57–3.54 (m, 2H), 3.27 (s, 3H), 2.33 (dt,  $J = 6.2, 4.7, 3.7, 1.7$  Hz, 4H), 1.94 (dq,  $J = 12.0, 8.1, 7.6$  Hz, 2H), 1.42–1.27 (m, 10H), 0.87 (t,  $J = 7.0$  Hz, 3H).

Derivation of Equation 5.

As noted, comparison of  $\tau_{OR}$  values for the different RTILs is done most effectively when the normalized charge density gradient is compared for the different RTILs.

$$\nabla \cdot \tau_{OR} = \left( \frac{\eta f}{k_B T S} \right) \nabla \cdot V = k \nabla \cdot V \quad [S1]$$

And from our previous work,

$$\nabla \cdot \tau_{OR} = k' \nabla \cdot D = k' \rho_f \quad [S2]$$

Where  $D$  is the charge displacement and  $\rho_f$  is the free charge density gradient. Because the gradient  $\rho_f$  is normal to the plane of the support, it can be expressed simply as  $\Delta\tau_{OR}$ , the difference in  $\tau_{OR}$  between  $x=0$  and  $x=\infty$ , which is determined by the difference in concentration of the RTIL ion (RI) that complexes with the rotating moiety being observed. From the Debye Stokes Einstein equation (Eq. 2) and prior work showing constant viscosity in the RTIL,

$$\begin{aligned} \tau_{OR}^{x=0} &= \frac{\eta V_{eff}^{x=0} f}{k_B T S} \\ \tau_{OR}^{x=\infty} &= \frac{\eta V_{eff}^{x=\infty} f}{k_B T S} \end{aligned} \quad [S3]$$

Where

$$\begin{aligned} V_{eff}^{x=0} &= X_{free}^{x=0} V_{free} + X_{complex}^{x=0} V_{complex} = X_{free}^{x=0} V_{free} + (1 - X_{free}^{x=0}) V_{complex} \\ V_{eff}^{x=0} &= V_{complex} + X_{free}^{x=0} (V_{free} - V_{complex}) = V_{complex} - X_{free}^{x=0} V_{RI} \end{aligned} \quad [S4]$$

$$\begin{aligned} V_{eff}^{x=\infty} &= X_{free}^{x=\infty} V_{free} + X_{complex}^{x=\infty} V_{complex} = X_{free}^{x=\infty} V_{free} + (1 - X_{free}^{x=\infty}) V_{complex} \\ V_{eff}^{x=\infty} &= V_{complex} + X_{free}^{x=\infty} (V_{free} - V_{complex}) = V_{complex} - X_{free}^{x=\infty} V_{RI} \end{aligned}$$

All of the chromophore is either free or complexed;  $X_{free} + X_{complex} = 1$ . The quantity  $V_{RI}$  is the volume of the RTIL counterion that complexes with the chromophore:  $V_{complex} = V_{free} + V_{RI}$ .

The difference in  $\tau_{OR}$  between  $x=0$  and  $x=\infty$ , normalized for bulk reorientation time,  $\tau_{OR}^{x=\infty}$  provides a way to characterize the fractional change in  $\tau_{OR}$  and allows for comparison between different RTILs.



$$\frac{\Delta \tau_{OR}}{\tau_{OR}} = \frac{\tau_{OR}^{x=0} - \tau_{OR}^{x=\infty}}{\tau_{OR}^{x=\infty}} = \frac{\Delta V}{V} = \frac{V_{eff}^{x=0} - V_{eff}^{x=\infty}}{V_{eff}^{x=\infty}} \quad [\text{S5}]$$

$$\frac{V_{eff}^{x=0} - V_{eff}^{x=\infty}}{V_{eff}^{x=\infty}} = \frac{(V_{assoc} - X_{free}^{x=0} V_{RI} - V_{assoc} + X_{free}^{x=\infty} V_{RI})}{V_{assoc} - X_{free}^{x=\infty} V_{RI}} = \frac{(X_{free}^{x=\infty} - X_{free}^{x=0}) V_{RI}}{V_{assoc} - X_{free}^{x=\infty} V_{RI}} \quad [\text{S6}]$$
